CORRECTION

# Correction: The pH-Responsive PacC Transcription Factor of *Aspergillus fumigatus* Governs Epithelial Entry and Tissue Invasion during Pulmonary Aspergillosis

The PLOS Pathogens Staff

The concentration of  $\alpha$ -Dectin-1 antibody and isotype control antibody is incorrect throughout the manuscript. The correct concentration of  $\alpha$ -Dectin-1 antibody and isotype control antibody is 3  $\mu$ g/ml.

## Reference

1. Bertuzzi M, Schrettli M, Alcazar-Fuoli L, Cairns TC, Muñoz A, Walker LA, et al. (2014) The pH-Responsive PacC Transcription Factor of *Aspergillus fumigatus* Governs Epithelial Entry and Tissue Invasion during Pulmonary Aspergillosis. PLoS Pathog 10(10): e1004413. doi: [10.1371/journal.ppat.1004413](https://doi.org/10.1371/journal.ppat.1004413) PMID: [25329394](https://pubmed.ncbi.nlm.nih.gov/25329394/)

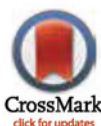

## OPEN ACCESS

**Citation:** The PLOS Pathogens Staff (2015) Correction: The pH-Responsive PacC Transcription Factor of *Aspergillus fumigatus* Governs Epithelial Entry and Tissue Invasion during Pulmonary Aspergillosis. PLoS Pathog 11(4): e1004802. doi:10.1371/journal.ppat.1004802

**Published:** April 8, 2015

**Copyright:** © 2015 The PLOS Pathogens Staff. This is an open access article distributed under the terms of the [Creative Commons Attribution License](https://creativecommons.org/licenses/by/4.0/), which permits unrestricted use, distribution, and reproduction in any medium, provided the original author and source are credited.
